# Supplementary material
Source: MDPI journal article supplement (https://www.mdpi.com/2073-445X/11/7/991)
Supplement: s1 [file s1]

**Supplementary Table S2.** Test for the cellulolytic and pectinolytic activities in various endophytic bacteria obtained in present study.

| Strain No. | $\beta$ -glucosidase | Cellobiohydrolase | Cellulase | Pectinase |
|------------|----------------------|-------------------|-----------|-----------|
| PM03       | +                    | -                 | -         | -         |
| PM05       | -                    | -                 | -         | -         |
| PM16       | +                    | -                 | ++        | -         |
| PM219      | -                    | -                 | +++       | -         |
| PM221      | -                    | +                 | -         | -         |
| PM223      | ++                   | -                 | ++        | +         |
| PM224      | ++                   | +                 | -         | -         |
| PM228      | ++                   | +                 | ++++      | -         |
| PM232      | ++                   | +                 | -         | -         |
| PM251      | -                    | -                 | -         | -         |
| PM253      | +                    | +                 | -         | -         |
| PM366      | ++                   | -                 | -         | -         |
| PM368      | ++                   | -                 | -         | -         |
| PM376      | -                    | +                 | +         | -         |
| PM377      | -                    | -                 | -         | -         |
| PM379      | +                    | +                 | +         | -         |
| PM380      | -                    | +                 | ++++      | -         |
| PM381      | -                    | +                 | ++        | -         |
| PM386      | -                    | +                 | -         | -         |
| PM389      | -                    | -                 | -         | -         |
| PM4106     | -                    | +                 | -         | -         |
| PM4107     | +                    | -                 | -         | -         |
| PM5143     | -                    | -                 | -         | +++       |
| PM5153     | -                    | -                 | -         | ++        |
| PM7220     | -                    | -                 | -         | +++       |
| PM7265     | -                    | -                 | -         | -         |
| PM8311     | -                    | -                 | -         | -         |
| PM8335     | -                    | -                 | -         | -         |
| PM8337     | ++                   | +                 | -         | -         |
| PM8342     | ++                   | +                 | -         | -         |
| PM9363     | -                    | -                 | -         | -         |
| PM9364     | -                    | -                 | -         | -         |
| PM9365     | ++                   | +                 | -         | -         |
| PM9366     | +                    | +                 | -         | -         |
| PM9367     | +                    | -                 | -         | -         |
| PM9368     | +                    | -                 | -         | -         |
| PM9369     | +                    | +                 | -         | -         |

---

|         |     |   |     |   |
|---------|-----|---|-----|---|
| PM9370  | +   | + | -   | - |
| PM9376  | -   | - | -   | - |
| PM9383  | -   | + | -   | - |
| PM9399  | +   | - | -   | - |
| PM9400  | +   | + | -   | - |
| PM9401  | +   | + | +++ | - |
| PM9402  | -   | + | +   | - |
| PM9403  | -   | - | -   | - |
| PM9404  | -   | - | -   | - |
| PM9405  | +   | - | -   | - |
| PM9406  | +   | - | -   | - |
| PM9408  | -   | - | -   | - |
| PM9409  | +   | + | -   | - |
| PM9410  | -   | - | -   | - |
| PM9411  | +++ | - | -   | - |
| PM9424  | -   | - | -   | - |
| PM9426  | -   | - | ++  | - |
| PM9427  | -   | - | -   | - |
| PM9429  | -   | - | +   | - |
| PM9430  | -   | - | ++  | - |
| PM9432  | -   | - | -   | - |
| PM9433  | -   | - | -   | - |
| PM9435  | -   | - | -   | - |
| PM9436  | -   | - | -   | - |
| PM9437  | -   | - | -   | - |
| PM9438  | ++  | - | -   | - |
| PM10455 | +   | - | -   | - |
| PM10458 | -   | - | -   | - |
| PM10459 | -   | - | -   | - |
| PM10461 | -   | + | -   | - |
| PM10462 | +++ | - | -   | - |
| PM10463 | ++  | + | -   | - |
| PM10476 | ++  | + | -   | - |
| PM10478 | ++  | + | -   | - |
| PM10490 | -   | - | -   | - |
| PM10491 | -   | - | -   | - |

---

|         |    |   |     |   |
|---------|----|---|-----|---|
| PM10503 | -  | - | +++ | - |
| PM10509 | -  | - | -   | - |
| PM10510 | ++ | + | -   | - |

- = absent, + = poor, ++ = average, +++ = good, ++++-Excellent
