# Supplementary material
Source: MDPI journal article supplement (https://www.mdpi.com/2073-445X/11/7/991)
Supplement: s1 [file s1]

**Supplementary Table S1.** Summary of the closest affiliations of the representative isolates in the GenBank according to the 16S-rRNA gene sequences.

| Isolate No. | Accession Number | Sequence Coverage | Closest NCBI match/Closest type strain                         | % Identity |
|-------------|------------------|-------------------|----------------------------------------------------------------|------------|
| PM03        | KC683731         | 100               | <i>Bacillus amyloliquefaciens</i> strain BVC18 (JQ660601)      | 100        |
| PM05        | HQ878378         | 100               | <i>Microbacterium assamensis</i> (FR832516)                    | 100        |
| PM16        | KC683732         | 100               | <i>Pantoea stewartii</i> AIMSTTP2S ( JN835507)                 | 93         |
| PM219       | KC683733         | 100               | <i>Pantoea stewartii</i> strain S9-116 ( JQ660286)             | 99         |
| PM221       | KC683734         | 100               | <i>Enterobacter cloacae</i> strain OVC28 (JQ660744)            | 100        |
| PM223       | KC683735         | 100               | <i>Bacillus cereus</i> Kt7-14 (JF460754)                       | 99         |
| PM224       | HQ878379         | 100               | <i>Enterobacter cloacae</i> strain MSSRFS8 (HQ701802)          | 100        |
| PM228       | KC683736         | 100               | <i>Bacillus</i> sp. ZW2531-1(EF567395)                         | 99         |
| PM232       | HQ878380         | 100               | <i>Enterobacter cloacae</i> strain MSSRFS8 (HQ701802)          | 100        |
| PM251       | KC683737         | 100               | <i>Stenotrophomonas maltophilia</i> strain YPA 1-1 (JQ308611 ) | 100        |
| PM253       | KC683738         | 100               | <i>Enterobacter cloacae</i> strain MSSRFS8 (HQ701802)          | 100        |
| PM366       | KC683739         | 100               | <i>Bacillus nealsonii</i> strain KTNB19 ( FJ864726)            | 99         |
| PM368       | KC683740         | 100               | <i>Stenotrophomonas maltophilia</i> strain EU84( JF681290)     | 100        |
| PM376       | KC683741         | 100               | <i>Pseudomonas putida</i> strain DS8 ( JQ791183)               | 100        |
| PM377       | KC683742         | 100               | <i>Pseudomonas</i> sp. AB_13 ( JQ033386)                       | 97         |
| PM379       | KC683743         | 99                | <i>Bacillus cereus</i> DF2C3 (DQ298085)                        | 98         |
| PM380       | KC683744         | 100               | <i>Bacillus subtilis</i> strain 1A337 (JQ746567)               | 99         |
| PM381       | KC683745         | 100               | <i>Bacillus amyloliquefaciens</i> MH18B1 (JN558839)            | 99         |
| PM386       | KC683746         | 100               | <i>Enterobacter cloacae</i> strain MSSRFS8 (HQ701802)          | 100        |
| PM389       | JF899310         | 100               | <i>Pseudomonas aeruginosa</i> ASFP-38 (HQ018741)               | 97         |
| PM4106      | KC683747         | 99                | <i>Enterobacter</i> sp. J54C13 (GQ901869)                      | 96         |
| PM4107      | JF899311         | 100               | <i>Pseudomonas aeruginosa</i> KZ3 (FJ695213)                   | 99         |
| PM5143      | KC683748         | 100               | <i>Pseudomonas fluorescens</i> A506 (CP003041)                 | 100        |
| PM5153      | KC683749         | 100               | <i>Pseudomonas fluorescens</i> A506 (CP003041)                 | 99         |
| PM7220      | KC683750         | 100               | <i>Microbacterium arborescens</i> strain S1-81 (JQ660028)      | 100        |
| PM7265      | JF899312         | 100               | <i>Pseudomonas aeruginosa</i> strain BP C2 ( JQ866912)         | 100        |
| PM8311      | KC683751         | 100               | <i>Ochrobactrum anthropi</i> strain BDUEBTVRMK33 (GU596495)    | 99         |
| PM8335      | KC683752         | 100               | <i>Bacillus flexus</i> strain NIO24 ( JQ818411)                | 100        |
| PM8337      | KC683753         | 95                | <i>Enterobacter</i> sp. Wy2-D9 ( JN986806)                     | 98         |
| PM8342      | KC683754         | 100               | <i>Enterobacter asburiae</i> strain M-T-MRS_23 (JQ795793)      | 100        |

|         |          |     |                                                                 |     |
|---------|----------|-----|-----------------------------------------------------------------|-----|
| PM9363  | KC683755 | 99  | <i>Stenotrophomonas maltophilia</i> strain YPA 1-1 (JQ308611)   | 99  |
| PM9364  | KC683756 | 100 | <i>Stenotrophomonas maltophilia</i> ( HE664167)                 | 99  |
| PM9365  | KC683757 | 100 | <i>Arthrobacter woluwensis</i> ED (HM536961)                    | 99  |
| PM9366  | KC683758 | 99  | <i>Arthrobacter woluwensis</i> ED (HM536961)                    | 99  |
| PM9367  | KC683759 | 100 | <i>Bacillus cereus</i> Kt7-14 (JF460754)                        | 99  |
| PM9368  | KC683760 | 99  | <i>Rhodococcus kroppenstedtii</i> strain AHJ_3 (JN873342)       | 99  |
| PM9369  | KC683761 | 100 | <i>Mycobacterium neoaurum</i> strain OS29 (JQ348111)            | 99  |
| PM9370  | KC683762 | 100 | <i>Stenotrophomonas maltophilia</i> strain YPA 1-1(JQ308611 )   | 99  |
| PM9376  | KC683763 | 96  | <i>Bacillus cereus</i> AIMST Musa3 (HQ694153)                   | 99  |
| PM9383  | KC683764 | 100 | <i>Enterobacter cloacae</i> strain RCT8 (HM805113)              | 100 |
| PM9399  | KC683765 | 97  | <i>Bacillus stratosphericus</i> strain 290 (JQ860101)           | 99  |
| PM9400  | KC683766 | 100 | <i>Microbacterium testaceum</i> StLB037 (AP012052)              | 99  |
| PM9401  | KC683767 | 100 | <i>Arthrobacter woluwensis</i> ED (HM536961)                    | 99  |
| PM9402  | KC683768 | 100 | <i>Curtobacterium oceanosedimentum</i> strain S9-644 (JQ660303) | 99  |
| PM9403  | KC683769 | 100 | <i>Rhodococcus</i> sp. Eu-32 (DQ386111)                         | 98  |
| PM9404  | KC683770 | 100 | <i>Nocardioides</i> sp. DWM128 (HM854514)                       | 99  |
| PM9405  | KC683771 | 99  | <i>Acinetobacter calcoaceticus</i> (AY800383)                   | 99  |
| PM9406  | KC683772 | 100 | <i>Stenotrophomonas maltophilia</i> (HE664167)                  | 100 |
| PM9408  | KC683773 | 100 | <i>Pseudomonas oryzae</i> (JQ388741)                            | 100 |
| PM9409  | KC683774 | 100 | <i>Rhodococcus qingshengii</i> strain HWG-A33 (JQ684256)        | 99  |
| PM9410  | KC683775 | 100 | <i>Nocardioides</i> sp. S2-186 ( JQ660079)                      | 99  |
| PM9411  | KC683776 | 100 | <i>Stenotrophomonas maltophilia</i> strain C-J-R2A1             | 99  |
| PM9424  | KC683777 | 100 | <i>Arthrobacter woluwensis</i> ED (HM536961)                    | 100 |
| PM9426  | KC683778 | 100 | <i>Arthrobacter woluwensis</i> MS4_481 (HM032831)               | 99  |
| PM9427  | KC683779 | 100 | <i>Arthrobacter woluwensis</i> ED (HM536961)                    | 99  |
| PM9429  | KC683780 | 97  | <i>Pantoea stewartii</i> strain S9-116 (JQ660286)               | 99  |
| PM9430  | KC683781 | 100 | <i>Bacillus cereus</i> Kt7-14 (JF460754)                        | 100 |
| PM9432  | KC683782 | 92  | <i>Bacillus cereus</i> strain H9B-3 (HQ238861)                  | 99  |
| PM9433  | KC683783 | 98  | <i>Pantoea stewartii</i> AIMST Nmie4 (JF819695)                 | 99  |
| PM9435  | KC683784 | 99  | <i>Pantoea stewartii</i> isolate 40G RT2A (EF189919)            | 100 |
| PM9436  | KC683785 | 100 | <i>Microbacterium testaceum</i> StLB037 (AP012052)              | 100 |
| PM9437  | KC683786 | 100 | <i>Agrobacterium larrymoorei</i> strain S3-89 (JQ660107)        | 99  |
| PM9438  | KC683787 | 100 | <i>Microbacterium testaceum</i> StLB037 (AP012052)              | 98  |
| PM10455 | KC683788 | 100 | <i>Rhizobium</i> sp. HPCkC-Ca(i) (HE802763)                     | 100 |
| PM10458 | KC683789 | 100 | <i>Bacillus pumilus</i> FS55 (AF260751)                         | 99  |
| PM10459 | KC683790 | 99  | <i>Ochrobactrum</i> sp. MVS1(JN089705)                          | 97  |
| PM10461 | KC683791 | 100 | <i>Rhizobium</i> sp. HPCkC-Ca(i) ( HE802763)                    | 100 |
| PM10462 | KC683792 | 100 | <i>Microbacterium testaceum</i> StLB037 (AP012052)              | 99  |
| PM10463 | KC683793 | 100 | <i>Acinetobacter</i> sp. XJ104-YF-7(JQ726509)                   | 98  |

|         |          |     |                                                           |     |
|---------|----------|-----|-----------------------------------------------------------|-----|
| PM10476 | KC683794 | 100 | <i>Ochrobactrum intermedium</i> strain<br>TND41(JQ660549) | 100 |
| PM10478 | KC683795 | 100 | <i>Ochrobactrum intermedium</i> strain<br>TND41(JQ660549) | 99  |
| PM10490 | JF899314 | 99  | <i>Pseudomonas aeruginosa</i> NQ8 (EU939706)              | 97  |
| PM10491 | JF899315 | 100 | <i>Pseudomonas aeruginosa</i> PB28 (JN408334)             | 100 |
| PM10503 | KC683796 | 92  | <i>Bacillus amyloliquefaciens</i> Kk3-3 (JF460724)        | 99  |
| PM10509 | KC683797 | 100 | <i>Pseudomonas fluorescens</i> strain hswx163 (JQ236807)  | 100 |
| PM10510 | KC683798 | 100 | <i>Bacillus pumilus</i> strain Y24 (JQ798393)             | 100 |
