# Supplementary material
Source: MDPI journal article supplement (https://www.mdpi.com/2073-445X/11/7/991)
Supplement: s1 [file s1]

**Supplementary Table S3** Primer sequences used for PR gene expression studies used in real time PCR.

| Primers          | Sequence (5'-3')           | Functions                                           | Amplicon (bp) | References                |
|------------------|----------------------------|-----------------------------------------------------|---------------|---------------------------|
| PR2 F            | CTCGACATCGGTAACGACCAG      | Glucanases                                          | 118           | Ray et al. 2003           |
| PR2 R            | GCGGCGATGTACTTGATGTTC      |                                                     |               |                           |
| PR3 F            | AGAGATAAGCAAGGCCACGTC      | Chitinases                                          | 115           | Desmond et al. 2006       |
| PR3 R            | GGTTGCTCACCAGGTCCTTC       |                                                     |               |                           |
| PR4 F            | CGAGGATCGTGGACCAGTG        | Antifungal protein                                  | 127           | Bertini et al. 2003       |
| PR4 R            | GTCGACGAACTGGTAGTTGACG     |                                                     |               |                           |
| PR5 F            | ACAGCTACGCCAAGGACGAC       | Thaumatococcus-like protein,<br>pathogen inhibitory | 90            | Kuwabara et al. 2002      |
| PR5 R            | CGCGTCCTAATCTAAGGGCAG      |                                                     |               |                           |
| PR9 F            | GAGATTCCACAGATGCAAACGAG    | Peroxidases                                         | 101           | Pritsch et al. 2000       |
| PR9 R            | GGAGGCCCTTGTTTCTGAATG      |                                                     |               |                           |
| PR10 F           | TTAAACCAGCACGAGAAACATCAG   | Ribonuclease-like                                   | 157           | Muthukrishnan et al. 2001 |
| PR10 R           | ATCCTCCCTCGATTATTCTCACG    |                                                     |               |                           |
| PR12 F           | GGCGAATTCCCGGACGTGCCTGTCGC | Plant Defensin                                      | 177           | Unknown                   |
| PR12 R           | CGCGTCGACTGGTGTGCTTAGCA    |                                                     |               |                           |
| PR16 F           | AACAAAGGTGATGTGTTCTGTCTTC  | Oxalate-like oxidase                                | 212           | Schweizer et al. 1999     |
| PR16 R           | GAGCCGGTCTATTGTATTCTTTTCC  |                                                     |               |                           |
| PDI F            | TTATGACTTTGGCCACACCG       | Protein disulfide isomerase                         | 100           | Ray et al. 2003           |
| PDI R            | CGAGCTCATCAAATGGCTTG       |                                                     |               |                           |
| $\beta$ -Tubulin | 5'-GCCATGTTTCAGGAGGAAGG-3' | Control gene                                        | 71            | Desmond et al.2006        |
| $\beta$ -Tubulin | 5'-CTCGGTGAACTCCATCTCGT-3' |                                                     |               |                           |
